# Supplementary material
Source: PubMed Central journal article supplement (PMC8358815)
Supplement: jamasurg-e213748-s001.pdf [file jamasurg-e213748-s001.pdf]

## Supplementary Online Content

Herrick-Reynolds KM, Punchhi G, Greenberg RS, et al. Evaluation of early vs standard liver transplant for alcohol-associated liver disease. *JAMA Surg*. Published online August 11, 2021. doi:10.1001/jamasurg.2021.3748

**eTable 1.** Assessment of Patients with Missing Alcohol History Data

**eFigure.** Alcohol-Associated Liver Disease With Less Than Six-Months Abstinence: Referrals and Committee Review

**eTable 2.** Hospitalization Characteristics by Liver Transplantation at Initial Listing Hospitalization

This supplementary material has been provided by the authors to give readers additional information about their work.

**eTable 1.** Assessment of Patients with Missing Alcohol History Data

|                                                       | No Missing Value<br>(n=132) | Any Missing Value<br>(n=31) | P    |
|-------------------------------------------------------|-----------------------------|-----------------------------|------|
| Early Liver Transplant, n (%)                         | 69 (52)                     | 19 (61)                     | .43  |
| Age at transplantation, y, median (IQR)               | 51.1 (41.5-58.0)            | 52.5 (49.5-58.0)            | 0.12 |
| Female, n (%)                                         | 46 (35)                     | 9 (29)                      | .67  |
| White Race, n (%)                                     | 114 (87)                    | 28 (90)                     | .81  |
| Marital Status, n (%)                                 |                             |                             |      |
| Single                                                | 17 (13)                     | 3 (10)                      | .34  |
| Married                                               | 64 (49)                     | 20 (65)                     |      |
| Cohabitate                                            | 7 (5)                       | 0 (0)                       |      |
| Divorced                                              | 33 (25)                     | 6 (19)                      |      |
| Divorced/cohabitate                                   | 7 (5)                       | 1 (3)                       |      |
| Partnered (no cohabitation)                           | 0 (0)                       | 1 (3)                       |      |
| Widowed                                               | 4 (3)                       | 0 (0)                       |      |
| Employed pre-transplant, n (%)                        |                             |                             |      |
| Employed                                              | 38 (29)                     | 14 (45)                     | .32  |
| Unemployed/Retired                                    | 63 (48)                     | 10 (32)                     |      |
| Medical Leave                                         | 17 (13)                     | 4 (13)                      |      |
| Disabled                                              | 14 (11)                     | 3 (10)                      |      |
| Smoker pre-transplantation                            |                             |                             |      |
| Never                                                 | 62 (47)                     | 20 (65)                     | .25  |
| Active                                                | 9 (7)                       | 1 (3)                       |      |
| Former                                                | 61 (46)                     | 10 (32)                     |      |
| History of Psych diagnosis, n (%)                     | 42 (32)                     | 9 (29)                      | .83  |
| <b>Transplant-Related Factors</b>                     |                             |                             |      |
| Transferred from OSH, n (%)                           | 63 (48)                     | 17 (55)                     | .55  |
| Time from listing to transplantation, d, median (IQR) | 14.0 (5.0-71.0)             | 33.0 (5.0-111.0)            | .60  |
| Received steroids pre-transplant, n (%)               | 34 (26)                     | 9 (29)                      | .82  |
| MELD at listing, median (IQR)                         | 28.5 (20.5-36.5)            | 25.0 (16.0-36.0)            | .29  |
| MELD at Transplantation, median (IQR)                 | 31.0 (23.0-38.0)            | 30.0 (20.0-38.0)            | .71  |
| Simultaneous kidney transplantation, n (%)            | 12 (9)                      | 3 (10)                      | >.99 |
| ICU requirement immediately preoperatively, n (%)     | 23 (18)                     | 5 (16)                      | >.99 |
| Dialysis pre-transplantation, n (%)                   | 41 (31)                     | 10 (32)                     | >.99 |
| Donor type, n (%)                                     |                             |                             |      |
| Donation after Brain Death                            | 117 (89)                    | 24 (77)                     | .14  |
| Donation after Cardiac Death                          | 7 (5)                       | 4 (13)                      |      |
| Living                                                | 8 (6)                       | 3 (10)                      |      |
| Meets clinical criteria for SAH, n (%)                | 54 (41)                     | 15 (48)                     | .70  |
| <b>Explant Pathology</b>                              |                             |                             |      |
| Cirrhosis, n (%)                                      | 128 (97)                    | 28 (90)                     | .13  |
| Incidental Hepatocellular Carcinoma, n (%)            | 7 (5)                       | 2 (7)                       | .68  |
| Alcoholic Hepatitis, n (%)                            | 66 (50)                     | 14 (45)                     | .69  |

**eFigure.** Alcohol-Associated Liver Disease With Less Than Six-Months Abstinence: Referrals and Committee Review

For the final year of the study (November 13, 2019–November 13, 2020), all transfer requests and committee listing meetings were reviewed. Committee decisions are reported, with the reason for decision and ultimate transplant outcome indicated.

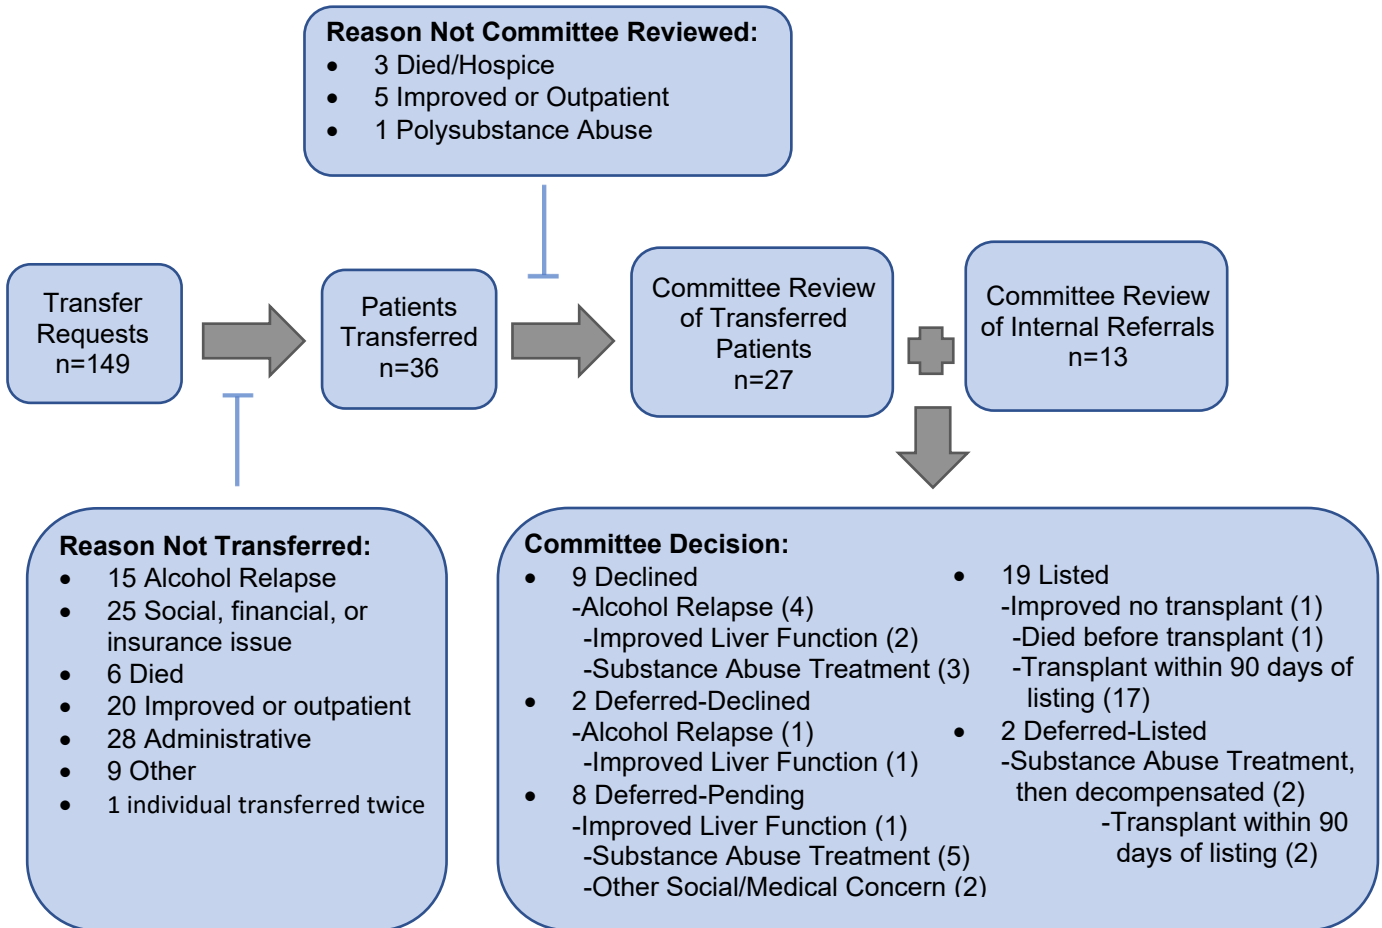

**eTable 2.** Hospitalization Characteristics by Liver Transplantation at Initial Listing Hospitalization

|                                                   | <b>Discharged Prior to Transplant (n=25)</b> | <b>Transplant at First Admission (n=63)</b> | <b>P</b> |
|---------------------------------------------------|----------------------------------------------|---------------------------------------------|----------|
| MELD at transplantation, median (IQR)             | 28.0 (21.0, 33.0)                            | 38.0 (34.0, 40.0)                           | <0.001   |
| MELD at listing, median (IQR)                     | 27.0 (23.0, 30.0)                            | 37.0 (34.0, 40.0)                           | <0.001   |
| Dialysis prior to transplant                      | 5 (20)                                       | 31 (50)                                     | .02      |
| Intubated prior to transplant, n (%)              | 1 (4)                                        | 4 (7)                                       | >.99     |
| ICU requirement immediately preoperatively, n (%) | 3 (12)                                       | 17 (27)                                     | .16      |
| Length of stay post-transplant, d, median (IQR)   | 12.0 (10.0-19.0)                             | 16.5 (13.0-30.0)                            | .03      |
| Readmission within 90-days, n (%)                 | 17 (68)                                      | 33 (52)                                     | .24      |
